# Supplementary material
Source: publisher figshare collection journal article supplement (https://acs.figshare.com/ndownloader/files/7032671)
Supplement: Supplementary file 1 [file 7032671]

 
data_2
 
_audit_creation_method            'SHELXL-2014/7'
_shelx_SHELXL_version_number      '2014/7'
_chemical_name_systematic         ?
_chemical_name_common             ?
_chemical_melting_point           ?
_chemical_formula_moiety          ?
_chemical_formula_sum
 'B Br2 O3 Rb Zn2' 
_chemical_formula_weight          434.84

loop_
 _atom_type_symbol
 _atom_type_description
 _atom_type_scat_dispersion_real
 _atom_type_scat_dispersion_imag
 _atom_type_scat_source
 'B'  'B'   0.0013   0.0007
 'International Tables Vol C Tables 4.2.6.8 and 6.1.1.4'
 'O'  'O'   0.0106   0.0060
 'International Tables Vol C Tables 4.2.6.8 and 6.1.1.4'
 'Zn'  'Zn'   0.2839   1.4301
 'International Tables Vol C Tables 4.2.6.8 and 6.1.1.4'
 'Br'  'Br'  -0.2901   2.4595
 'International Tables Vol C Tables 4.2.6.8 and 6.1.1.4'
 'Rb'  'Rb'  -0.9393   2.9676
 'International Tables Vol C Tables 4.2.6.8 and 6.1.1.4'
 
_space_group_crystal_system       trigonal
_space_group_IT_number            155
_space_group_name_H-M_alt         'R 3 2 :H'
_space_group_name_Hall            'R 3 2"'
 
_shelx_space_group_comment
;
The symmetry employed for this shelxl refinement is uniquely defined
by the following loop, which should always be used as a source of
symmetry information in preference to the above space-group names.
They are only intended as comments.
;
 
loop_
 _space_group_symop_operation_xyz
 'x, y, z'
 '-y, x-y, z'
 '-x+y, -x, z'
 'y, x, -z'
 'x-y, -y, -z'
 '-x, -x+y, -z'
 'x+2/3, y+1/3, z+1/3'
 '-y+2/3, x-y+1/3, z+1/3'
 '-x+y+2/3, -x+1/3, z+1/3'
 'y+2/3, x+1/3, -z+1/3'
 'x-y+2/3, -y+1/3, -z+1/3'
 '-x+2/3, -x+y+1/3, -z+1/3'
 'x+1/3, y+2/3, z+2/3'
 '-y+1/3, x-y+2/3, z+2/3'
 '-x+y+1/3, -x+2/3, z+2/3'
 'y+1/3, x+2/3, -z+2/3'
 'x-y+1/3, -y+2/3, -z+2/3'
 '-x+1/3, -x+y+2/3, -z+2/3'
 
_cell_length_a                    4.982(3)
_cell_length_b                    4.982(3)
_cell_length_c                    29.20(3)
_cell_angle_alpha                 90
_cell_angle_beta                  90
_cell_angle_gamma                 120
_cell_volume                      627.7(10)
_cell_formula_units_Z             3
_cell_measurement_temperature     293(2)
_cell_measurement_reflns_used     505
_cell_measurement_theta_min       4.1877
_cell_measurement_theta_max       27.4624
 
_exptl_crystal_description       'Prism'
_exptl_crystal_colour             'White'
_exptl_crystal_density_meas       ?
_exptl_crystal_density_method     ?
_exptl_crystal_density_diffrn     3.451          
_exptl_crystal_F_000              588
_exptl_transmission_factor_min    ?
_exptl_transmission_factor_max    ?
_exptl_crystal_size_max           0.2000
_exptl_crystal_size_mid          0.2000
_exptl_crystal_size_min            0.0500
_exptl_absorpt_coefficient_mu     20.992
_shelx_estimated_absorpt_T_min    ?
_shelx_estimated_absorpt_T_max    ?
_exptl_absorpt_correction_type    'Multi-scan'
_exptl_absorpt_correction_T_min  0.4940
_exptl_absorpt_correction_T_max   1.0000
_exptl_absorpt_process_details    ?
_exptl_absorpt_special_details    ?
_diffrn_ambient_temperature       293(2)
_diffrn_radiation_wavelength      0.71073
_diffrn_radiation_type            MoK\a
_diffrn_source                     'Sealed Tube'
_diffrn_measurement_device
;
Mercury70 (2x2 bin mode)
;
_diffrn_measurement_method        'CCD_Profile_fitting'
_diffrn_detector_area_resol_mean   14.6306
_diffrn_reflns_number             1428
_diffrn_reflns_av_unetI/netI      0.0616
_diffrn_reflns_av_R_equivalents   0.0650
_diffrn_reflns_limit_h_min        -6
_diffrn_reflns_limit_h_max        6
_diffrn_reflns_limit_k_min        -6
_diffrn_reflns_limit_k_max        6
_diffrn_reflns_limit_l_min        -26
_diffrn_reflns_limit_l_max        37
_diffrn_reflns_theta_min          4.188
_diffrn_reflns_theta_max          27.467
_diffrn_reflns_theta_full         25.242
_diffrn_measured_fraction_theta_max   0.955
_diffrn_measured_fraction_theta_full  0.949
_diffrn_reflns_Laue_measured_fraction_max    0.955
_diffrn_reflns_Laue_measured_fraction_full   0.949
_diffrn_reflns_point_group_measured_fraction_max   0.961
_diffrn_reflns_point_group_measured_fraction_full  0.961
_reflns_number_total              319
_reflns_number_gt                 265
_reflns_threshold_expression      'I > 2\s(I)'
_reflns_Friedel_coverage          0.509
_reflns_Friedel_fraction_max      0.973
_reflns_Friedel_fraction_full     0.988
 
_reflns_special_details
;
 Reflections were merged by SHELXL according to the crystal
 class for the calculation of statistics and refinement.
 
 _reflns_Friedel_fraction is defined as the number of unique
 Friedel pairs measured divided by the number that would be
 possible theoretically, ignoring centric projections and
 systematic absences.
;
 
_computing_data_collection        ?
_computing_cell_refinement        ?
_computing_data_reduction         ?
_computing_structure_solution     ?
_computing_structure_refinement 'SHELXL-2014/7 (Sheldrick, 2014)'
_computing_molecular_graphics     ?
_computing_publication_material   ?
_refine_special_details
;
 Refined as a 2-component twin.
;
_refine_ls_structure_factor_coef  Fsqd
_refine_ls_matrix_type            full
_refine_ls_weighting_scheme       calc
_refine_ls_weighting_details
'w=1/[\s^2^(Fo^2^)+(0.0727P)^2^] where P=(Fo^2^+2Fc^2^)/3'
_atom_sites_solution_primary      ?
_atom_sites_solution_secondary    ?
_atom_sites_solution_hydrogens    .
_refine_ls_hydrogen_treatment     undef
_refine_ls_extinction_method      'SHELXL-2014/7 (Sheldrick 2014'
_refine_ls_extinction_coef        0.0043(14)
_refine_ls_extinction_expression
 'Fc^*^=kFc[1+0.001xFc^2^\l^3^/sin(2\q)]^-1/4^'
_refine_ls_abs_structure_details
;
 Flack x determined using 73 quotients [(I+)-(I-)]/[(I+)+(I-)]
 (Parsons, Flack and Wagner, Acta Cryst. B69 (2013) 249-259).
;
_refine_ls_abs_structure_Flack    0.06(4)
_chemical_absolute_configuration  ?
_refine_ls_number_reflns          319
_refine_ls_number_parameters      18
_refine_ls_number_restraints      0
_refine_ls_R_factor_all           0.0597
_refine_ls_R_factor_gt            0.0546
_refine_ls_wR_factor_ref          0.1262
_refine_ls_wR_factor_gt           0.1234
_refine_ls_goodness_of_fit_ref    1.079
_refine_ls_restrained_S_all       1.079
_refine_ls_shift/su_max           0.000
_refine_ls_shift/su_mean          0.000
 
loop_
 _atom_site_label
 _atom_site_type_symbol
 _atom_site_fract_x
 _atom_site_fract_y
 _atom_site_fract_z
 _atom_site_U_iso_or_equiv
 _atom_site_adp_type
 _atom_site_occupancy
 _atom_site_site_symmetry_order  
 _atom_site_calc_flag
 _atom_site_refinement_flags_posn
 _atom_site_refinement_flags_adp
 _atom_site_refinement_flags_occupancy
 _atom_site_disorder_assembly
 _atom_site_disorder_group
Br1 Br -0.6667 -0.3333 -0.06063(7) 0.0514(8) Uani 1 3 d S T P . .
Zn1 Zn -0.6667 -0.3333 -0.14263(6) 0.0177(7) Uani 1 3 d S T P . .
O1 O -0.6086(18) 0.0581(18) -0.1667 0.020(3) Uani 1 2 d S T P . .
B1 B -0.3333 0.3333 -0.1667 0.013(4) Uani 1 6 d S T P . .
Rb1 Rb 0.0000 0.0000 0.0000 0.0554(10) Uani 1 6 d S T P . .
 
loop_
 _atom_site_aniso_label
 _atom_site_aniso_U_11
 _atom_site_aniso_U_22
 _atom_site_aniso_U_33
 _atom_site_aniso_U_23
 _atom_site_aniso_U_13
 _atom_site_aniso_U_12
Br1 0.0614(10) 0.0614(10) 0.0312(16) 0.000 0.000 0.0307(5)
Zn1 0.0114(7) 0.0114(7) 0.0305(14) 0.000 0.000 0.0057(3)
O1 0.013(3) 0.013(3) 0.037(8) 0.003(2) -0.003(2) 0.007(4)
B1 0.014(6) 0.014(6) 0.011(13) 0.000 0.000 0.007(3)
Rb1 0.0480(11) 0.0480(11) 0.070(3) 0.000 0.000 0.0240(5)
 
_geom_special_details
;
 All esds (except the esd in the dihedral angle between two l.s. planes)
 are estimated using the full covariance matrix.  The cell esds are taken
 into account individually in the estimation of esds in distances, angles
 and torsion angles; correlations between esds in cell parameters are only
 used when they are defined by crystal symmetry.  An approximate (isotropic)
 treatment of cell esds is used for estimating esds involving l.s. planes.
;
 
loop_
 _geom_bond_atom_site_label_1
 _geom_bond_atom_site_label_2
 _geom_bond_distance
 _geom_bond_site_symmetry_2
 _geom_bond_publ_flag
Br1 Zn1 2.394(4) . ?
Br1 Rb1 3.378(2) 1_455 ?
Br1 Rb1 3.378(2) . ?
Br1 Rb1 3.378(2) 1_445 ?
Zn1 O1 1.953(5) 2_455 ?
Zn1 O1 1.953(5) 3_445 ?
Zn1 O1 1.953(5) . ?
O1 B1 1.371(9) . ?
O1 Zn1 1.953(5) 16_454 ?
B1 O1 1.371(9) 2_565 ?
B1 O1 1.371(9) 3_455 ?
Rb1 Br1 3.378(2) 4_665 ?
Rb1 Br1 3.378(2) 4 ?
Rb1 Br1 3.378(2) 1_665 ?
Rb1 Br1 3.378(2) 4_565 ?
Rb1 Br1 3.378(2) 1_655 ?
Rb1 Rb1 4.982(3) 1_665 ?
Rb1 Rb1 4.982(3) 1_445 ?
Rb1 Rb1 4.982(3) 1_545 ?
Rb1 Rb1 4.982(3) 1_455 ?
Rb1 Rb1 4.982(3) 1_655 ?
Rb1 Rb1 4.982(3) 1_565 ?
 
loop_
 _geom_angle_atom_site_label_1
 _geom_angle_atom_site_label_2
 _geom_angle_atom_site_label_3
 _geom_angle
 _geom_angle_site_symmetry_1
 _geom_angle_site_symmetry_3
 _geom_angle_publ_flag
Zn1 Br1 Rb1 121.61(4) . 1_455 ?
Zn1 Br1 Rb1 121.61(4) . . ?
Rb1 Br1 Rb1 95.04(6) 1_455 . ?
Zn1 Br1 Rb1 121.61(4) . 1_445 ?
Rb1 Br1 Rb1 95.04(6) 1_455 1_445 ?
Rb1 Br1 Rb1 95.04(6) . 1_445 ?
O1 Zn1 O1 107.84(8) 2_455 3_445 ?
O1 Zn1 O1 107.84(8) 2_455 . ?
O1 Zn1 O1 107.84(8) 3_445 . ?
O1 Zn1 Br1 111.06(8) 2_455 . ?
O1 Zn1 Br1 111.06(8) 3_445 . ?
O1 Zn1 Br1 111.06(8) . . ?
B1 O1 Zn1 125.0(2) . 16_454 ?
B1 O1 Zn1 125.0(2) . . ?
Zn1 O1 Zn1 110.0(4) 16_454 . ?
O1 B1 O1 120.000(2) . 2_565 ?
O1 B1 O1 120.000(1) . 3_455 ?
O1 B1 O1 120.000(6) 2_565 3_455 ?
Br1 Rb1 Br1 95.04(6) 4_665 4 ?
Br1 Rb1 Br1 84.96(6) 4_665 1_665 ?
Br1 Rb1 Br1 180.00(6) 4 1_665 ?
Br1 Rb1 Br1 95.04(6) 4_665 4_565 ?
Br1 Rb1 Br1 95.04(6) 4 4_565 ?
Br1 Rb1 Br1 84.96(6) 1_665 4_565 ?
Br1 Rb1 Br1 84.96(6) 4_665 1_655 ?
Br1 Rb1 Br1 84.96(6) 4 1_655 ?
Br1 Rb1 Br1 95.04(6) 1_665 1_655 ?
Br1 Rb1 Br1 180.00(6) 4_565 1_655 ?
Br1 Rb1 Br1 180.0 4_665 . ?
Br1 Rb1 Br1 84.96(6) 4 . ?
Br1 Rb1 Br1 95.04(6) 1_665 . ?
Br1 Rb1 Br1 84.96(6) 4_565 . ?
Br1 Rb1 Br1 95.04(6) 1_655 . ?
Br1 Rb1 Rb1 42.48(3) 4_665 1_665 ?
Br1 Rb1 Rb1 137.52(3) 4 1_665 ?
Br1 Rb1 Rb1 42.48(3) 1_665 1_665 ?
Br1 Rb1 Rb1 90.0 4_565 1_665 ?
Br1 Rb1 Rb1 90.0 1_655 1_665 ?
Br1 Rb1 Rb1 137.52(3) . 1_665 ?
Br1 Rb1 Rb1 137.52(3) 4_665 1_445 ?
Br1 Rb1 Rb1 42.48(3) 4 1_445 ?
Br1 Rb1 Rb1 137.52(3) 1_665 1_445 ?
Br1 Rb1 Rb1 90.0 4_565 1_445 ?
Br1 Rb1 Rb1 90.0 1_655 1_445 ?
Br1 Rb1 Rb1 42.48(3) . 1_445 ?
Rb1 Rb1 Rb1 180.0 1_665 1_445 ?
Br1 Rb1 Rb1 90.0 4_665 1_545 ?
Br1 Rb1 Rb1 42.48(3) 4 1_545 ?
Br1 Rb1 Rb1 137.52(3) 1_665 1_545 ?
Br1 Rb1 Rb1 137.52(3) 4_565 1_545 ?
Br1 Rb1 Rb1 42.48(3) 1_655 1_545 ?
Br1 Rb1 Rb1 90.0 . 1_545 ?
Rb1 Rb1 Rb1 120.0 1_665 1_545 ?
Rb1 Rb1 Rb1 60.0 1_445 1_545 ?
Br1 Rb1 Rb1 137.52(3) 4_665 1_455 ?
Br1 Rb1 Rb1 90.0 4 1_455 ?
Br1 Rb1 Rb1 90.0 1_665 1_455 ?
Br1 Rb1 Rb1 42.48(3) 4_565 1_455 ?
Br1 Rb1 Rb1 137.52(3) 1_655 1_455 ?
Br1 Rb1 Rb1 42.48(3) . 1_455 ?
Rb1 Rb1 Rb1 120.0 1_665 1_455 ?
Rb1 Rb1 Rb1 60.0 1_445 1_455 ?
Rb1 Rb1 Rb1 120.0 1_545 1_455 ?
Br1 Rb1 Rb1 42.48(3) 4_665 1_655 ?
Br1 Rb1 Rb1 90.0 4 1_655 ?
Br1 Rb1 Rb1 90.0 1_665 1_655 ?
Br1 Rb1 Rb1 137.52(3) 4_565 1_655 ?
Br1 Rb1 Rb1 42.48(3) 1_655 1_655 ?
Br1 Rb1 Rb1 137.52(3) . 1_655 ?
Rb1 Rb1 Rb1 60.0 1_665 1_655 ?
Rb1 Rb1 Rb1 120.0 1_445 1_655 ?
Rb1 Rb1 Rb1 60.0 1_545 1_655 ?
Rb1 Rb1 Rb1 180.0 1_455 1_655 ?
Br1 Rb1 Rb1 90.0 4_665 1_565 ?
Br1 Rb1 Rb1 137.52(3) 4 1_565 ?
Br1 Rb1 Rb1 42.48(3) 1_665 1_565 ?
Br1 Rb1 Rb1 42.48(3) 4_565 1_565 ?
Br1 Rb1 Rb1 137.52(3) 1_655 1_565 ?
Br1 Rb1 Rb1 90.0 . 1_565 ?
Rb1 Rb1 Rb1 60.0 1_665 1_565 ?
Rb1 Rb1 Rb1 120.0 1_445 1_565 ?
Rb1 Rb1 Rb1 180.0 1_545 1_565 ?
Rb1 Rb1 Rb1 60.0 1_455 1_565 ?
Rb1 Rb1 Rb1 120.0 1_655 1_565 ?
 
_refine_diff_density_max    1.727
_refine_diff_density_min   -2.814
_refine_diff_density_rms    0.409

_shelx_res_file
;

    2.res created by SHELXL-2014/7


TITL 2 in R32
CELL 0.71073   4.9823   4.9823  29.1994  90.000  90.000 120.000
ZERR    3.00   0.0034   0.0034   0.0264   0.000   0.000   0.000
LATT -3
SYMM -Y, X-Y, Z
SYMM -X+Y, -X, Z
SYMM Y, X, -Z
SYMM X-Y, -Y, -Z
SYMM -X, -X+Y, -Z
SFAC B O ZN BR RB
UNIT 3 9 6 6 3

L.S. 300
BOND
FMAP 2
PLAN 20
TWIN -1 0 0 0 -1 0 0 0 1
ACTA

WGHT    0.072700
EXTI    0.004274
BASF   0.02499
FVAR       0.32296
MOLE   1
BR1   4   -0.666667   -0.333333   -0.060633    10.33330    0.06144    0.06144 =
         0.03118    0.00000    0.00000    0.03072
ZN1   3   -0.666667   -0.333333   -0.142631    10.33330    0.01139    0.01139 =
         0.03046    0.00000    0.00000    0.00569
O1    2   -0.608574    0.058093   -0.166667    10.50000    0.01278    0.01278 =
         0.03655    0.00324   -0.00324    0.00704
B1    1   -0.333333    0.333333   -0.166667    10.16667    0.01422    0.01422 =
         0.01054    0.00000    0.00000    0.00711
RB1   5    0.000000    0.000000    0.000000    10.16667    0.04800    0.04800 =
         0.07014    0.00000    0.00000    0.02400
MOLE   2
HKLF 4

REM  2 in R32
REM R1 =  0.0546 for     265 Fo > 4sig(Fo)  and  0.0597 for all     319 data
REM     18 parameters refined using      0 restraints

END

WGHT      0.0786      0.0000

REM Highest difference peak  1.727,  deepest hole -2.814,  1-sigma level  0.409
Q1    1  -0.5666 -0.4343 -0.0685  11.00000  0.05    1.58
Q2    1  -0.8017 -0.6138 -0.0564  11.00000  0.05    1.09
Q3    1  -0.6667 -0.3333 -0.2367  10.33333  0.05    1.01
Q4    1  -0.4394 -0.2171 -0.0908  11.00000  0.05    0.97
Q5    1  -0.5673 -0.1335 -0.1116  11.00000  0.05    0.95
Q6    1  -0.3333  0.3333 -0.1895  10.33333  0.05    0.82
Q7    1  -0.6529  0.0205 -0.0742  11.00000  0.05    0.81
Q8    1  -0.7526  0.1235 -0.1839  11.00000  0.05    0.80
Q9    1  -0.6458 -0.6506 -0.0730  11.00000  0.05    0.73
Q10   1  -0.5627 -0.4350 -0.0324  11.00000  0.05    0.71
Q11   1  -0.6667 -0.3333 -0.0009  10.33333  0.05    0.65
Q12   1  -0.1398  0.1033  0.0043  11.00000  0.05    0.59
Q13   1  -0.2356 -0.0814 -0.0791  11.00000  0.05    0.58
Q14   1  -0.1753  0.1934  0.0161  11.00000  0.05    0.54
Q15   1  -0.6641  0.3333 -0.1667  10.50000  0.05    0.53
Q16   1  -0.6300  0.1781 -0.1737  11.00000  0.05    0.52
Q17   1  -0.4734 -0.2337 -0.1706  11.00000  0.05    0.49
Q18   1  -0.6808  0.0376 -0.2173  11.00000  0.05    0.49
Q19   1  -0.4532  0.0939 -0.2028  11.00000  0.05    0.44
Q20   1  -0.7862 -0.5752 -0.1345  11.00000  0.05    0.42
;
_shelx_res_checksum   10514

_shelx_hkl_file
;
   0   0   6 1413.06   32.55
   0   0   9 3664.53   79.68
   0   0  12  609.46   20.56
   0   0  15 4484.52   91.83
   0   0  15 4095.10   83.75
  -1   0  35  323.44   69.91
  -1   0  32  170.78   39.56
  -1   0  29   10.28   12.59
  -1   0  26 1915.37  340.56
  -1   0  23  164.77   21.63
  -1   0  20   10.28   13.58
   1  -1  20   17.63    4.65
  -1   0  17   98.45   15.45
   1  -1  17  170.75   15.89
   1   0 -17  155.38    8.94
  -1   0  14  432.65   31.58
   1   0 -14  410.76   19.47
   1  -1  14  384.43   23.63
   0  -1 -14  400.25   35.08
  -1   0  11 9999.98  767.45
   1  -1  11 7708.96  594.86
   0  -1 -11 8261.38  645.12
  -1   0   8   41.49   15.37
   0   1   8   39.73    3.89
   0  -1  -8   37.22    4.87
   1   0  -8   36.54    7.40
   1  -1   8   21.26   11.92
   0  -1  -8   36.25   12.59
  -1   0   5 1078.22   34.76
   0   1   5 1007.91   23.77
   0  -1  -5 1010.60   23.96
  -1   1  -5  999.37   40.04
   1   0  -5  831.53   35.43
   1  -1   5  942.99   45.37
   0  -1  -5 1017.28   58.02
   1  -1   5  955.84   22.42
  -1   1  -5  951.51   23.81
   0  -1  -2 2799.28   59.42
  -1   0   2 2646.96   61.69
  -1   1  -2 2878.14   71.59
   1   0  -2 2937.41   83.76
   1  -1   2 2803.71   86.16
   0  -1  -2 2565.33   98.23
   0   1   2 2770.06   67.25
   0  -1   1 1043.11   30.92
  -1   0  -1  998.67   31.28
  -1   1   1 1025.71   29.46
   1  -1  -1 1209.70   48.03
   0  -1   1  895.92   60.29
   0   1  -1  960.26   28.55
   1   0   1 1007.73   28.24
   1  -1  -4 7434.41  572.00
   0  -1   4 7430.53  205.49
  -1   1   7 1229.90   30.68
  -1   0  -7 1324.48   41.69
   1  -1  -7 1200.76   41.64
   0  -1   7 1292.20   51.45
   0   1  -7 1246.86   39.03
  -1   1  10 3459.18   78.18
  -1   0 -10 3079.11   82.37
  -1   1  13 4079.63   95.14
  -1   0 -13 4207.41  115.47
   1   0  13 3808.18  105.54
   0   1 -13 3949.16   85.30
   1  -1 -13 3666.22   94.42
  -1   1  16  704.37   36.41
   1   0  16  942.83   50.99
   1  -1 -16  804.92   38.22
  -1   1  19    2.30    3.31
   1   0  19    4.74    4.34
   1  -1 -19   11.80   11.00
  -1   1  25  206.57   26.09
  -1   1  28  224.87   28.03
   0  -1  34  112.39   32.92
   0  -1  37  562.05  111.97
  -2   1  27    6.11   12.37
  -2   1  24  644.88   62.42
  -2   1  18   86.77   14.92
  -1  -1 -18   54.37   13.68
   2  -1 -18   56.07   10.91
   1  -2  18  117.14   16.20
  -2   1  15 3923.12  111.58
  -1  -1 -15 3728.19   97.92
   2  -1 -15 3867.14  103.09
   1  -2  15 4118.74  115.80
  -2   1  12   79.18   16.33
  -1  -1 -12   48.67    8.12
   2  -1 -12   53.41   11.91
   1  -2  12   64.48   11.89
   1   1  12   69.47    9.48
  -1   2 -12   45.41    8.07
  -2   1   9  582.72   27.29
  -1  -1  -9  542.69   24.56
   2  -1  -9  478.41   30.50
   1  -2   9  693.99   50.68
   1   1   9  605.08   28.33
  -1   2  -9  533.20   24.44
  -2   1   6  405.25   23.60
  -1  -1  -6  383.12   22.23
   2  -1  -6  354.44   32.74
   1  -2   6  323.99   35.82
   1   1   6  426.25   23.06
  -1   2  -6  373.49   20.34
  -1  -1  -3  186.18   15.94
  -2   1   3  141.18   15.25
   2  -1  -3  194.18   20.09
   1  -2   3  111.78   21.22
  -1   2  -3  190.21   12.67
   1   1   3  134.96   14.90
   2  -1   0 7654.61  592.38
   1  -2   0 7362.42  192.15
  -1  -1   3  211.48   17.86
  -2   1  -3  134.29   14.19
   2  -1   3  185.80   22.63
   1  -2  -3  114.75   19.22
   1   1  -3  137.14   13.53
  -1  -1   6  380.07   23.98
   1  -2  -6  419.84   11.82
  -2   1  -6  426.74   25.56
   2  -1   6  324.17   35.06
   1  -2  -6  491.70   41.11
   1   1  -6  427.94   25.39
  -1  -1   9  619.47   38.56
  -2   1  -9  600.67   34.40
   2  -1   9  426.15   45.22
   1  -2  -9  619.47   43.42
   1   1  -9  610.49   34.05
  -1  -1  12   64.71   21.84
  -2   1 -12   77.74   16.59
   2  -1  12   64.44   44.61
   1  -2 -12  154.70   31.48
   2  -1  12   50.74    3.97
  -1  -1  15 4411.55  145.92
  -2   1 -15 4033.91  129.20
   1   1 -15 4495.48  114.44
   2  -1  15 4621.20  157.22
   1  -2 -15 3991.05  131.68
  -1  -1  18   49.37   51.16
  -1   2  18   47.42    8.59
   1   1 -18  104.19   13.82
   2  -1  18   61.94   14.56
   1  -2 -18  247.97   47.46
   1  -2 -21 1424.84   93.35
  -1  -1  24  991.08  106.05
   1  -2 -24 1442.17  139.56
  -1  -1  27   27.32   25.16
  -1  -1  30   56.62   57.30
  -1  -1  33  202.87   51.66
  -1  -1  36  204.19   58.09
  -2   0  34   77.54   22.12
  -2   0  31    2.25    7.65
  -2   0  28   95.15   18.61
  -2   0  25  105.70   19.31
  -2   0  22  808.28   77.73
  -2   0  19    0.76    7.59
   2   0 -19    4.44    7.28
   2  -2  19    7.30    8.61
  -2   0  16  411.33   32.40
   2   0 -16  416.40   27.45
   2  -2  16  432.73   32.94
   0  -2 -16  459.23   51.24
  -2   0  13 2233.68   83.62
   0  -2 -13 2367.60   58.74
   2   0 -13 2363.54   88.35
   2  -2  13 2305.88   92.13
   0  -2 -13 2631.27  137.27
  -2   0  10 1738.20   78.16
   0  -2 -10 1618.86   39.62
   2   0 -10 1674.35   78.02
   2  -2  10 1833.45   93.32
   0  -2 -10 1928.61  116.06
  -2   0   7  906.43   44.42
   0  -2  -7  839.36   24.54
  -2   2  -7  905.33   49.76
   2   0  -7  866.47   55.04
   2  -2   7  763.97   58.67
   0  -2  -7  878.83   72.32
   0   2   7  886.12   38.58
  -2   2  -7  887.27   25.58
   0  -2  -4 2602.00   60.85
  -2   0   4 2570.78   75.79
  -2   2  -4 2743.18   86.05
   2   0  -4 2752.87  111.35
   2  -2   4 2624.39  104.40
   0  -2  -4 2902.81  147.04
  -2   2  -4 2590.04   58.62
   0   2   4 2634.87   76.13
   2   0  -4 2367.53   70.30
   0  -2  -1 1054.25   33.74
  -2   0   1  993.02   39.09
  -2   2  -1 1087.64   43.45
   2   0  -1 1093.07   60.15
   2  -2   1  989.91   53.22
   0  -2  -1  936.04   82.87
   0   2   1  991.59   36.88
   2   0  -1 1004.17   37.51
   0  -2   2 2671.51   73.89
  -2   0  -2 2439.55   70.15
  -2   2   2 2381.01   67.46
   2   0   2 2319.88  102.91
   2  -2  -2 2551.78   94.92
   0  -2   2 2354.84  155.04
   0   2  -2 2223.54   63.71
   2   0   2 2271.05   61.80
   0  -2   5 1339.63   49.97
  -2   0  -5 1313.91   46.99
  -2   2   5 1320.50   41.90
   2   0   5 1157.83   76.52
   2  -2  -5 1280.46   57.93
   0  -2   5 1570.07  101.03
   0   2  -5 1317.52   47.34
   2   0   5 1239.50   39.61
   0  -2   8   59.25   12.75
  -2   2   8   60.23    7.78
  -2   0  -8   59.81   10.29
   2   0   8   68.69   22.28
   2  -2  -8   62.34   13.71
   0  -2   8   72.37   25.33
   2   0   8   58.08    7.91
   0   2  -8   62.72   10.26
  -2   2  11 5994.31  130.45
  -2   0 -11 5885.59  145.23
   2   0  11 7309.81  226.04
   2  -2 -11 6111.03  163.20
   0  -2  11 6789.14  206.12
   2   0  11 6110.23  133.39
   0   2 -11 6210.15  151.91
  -2   2  14   76.11    8.62
  -2   0 -14   72.46   13.32
   2   0  14   95.63   20.02
   2  -2 -14  101.96   20.12
   0  -2  14   87.26   19.64
   2   0  14   78.30    9.35
   0   2 -14   76.13   13.22
  -2   2  17   15.28    8.00
  -2   0 -17   15.15    8.26
   2   0  17   24.43   36.75
   2  -2 -17   22.09   11.43
   2   0  17   18.58    5.79
  -2   2  20   19.06   12.76
  -2   0 -20   23.08   12.67
   2   0  20   20.30   24.07
   2  -2 -20   25.26   11.54
   2   0  23  155.12   25.66
   2  -2 -23  272.78   44.73
   0  -2  26 1377.91  129.73
   0  -2  29    2.96    9.98
   0  -2  32  127.31   35.76
   0  -2  35  247.67   62.08
   2   1  25  247.83   44.45
   2   1  25  135.19   22.02
  -3   2  22  863.32   79.88
  -2  -1 -22  810.34   76.76
   3  -2 -22 1364.94  127.90
   2   1  22  758.85   81.59
  -3   2  19    2.99    4.25
  -2  -1 -19   11.31    8.18
   3  -2 -19   13.95   10.00
   1  -3  19   16.85   22.23
   2   1  19    6.78    8.23
  -3   2  16  397.65   32.46
  -2  -1 -16  390.23   29.34
   3  -2 -16  388.30   32.56
   1  -3  16  438.41   42.31
   2   1  16  397.50   40.78
  -1   3 -16  403.39   30.55
  -3   2  13 1629.37   63.94
  -2  -1 -13 1554.86   59.25
   3  -2 -13 1426.89   63.90
   1  -3  13 1798.30   88.69
   2   1  13 1657.33   65.07
  -1   3 -13 1604.11   59.78
  -3   2  10 1313.10   49.70
  -2  -1 -10 1252.29   49.77
   3  -2 -10 1221.87   60.92
   1  -3  10 1436.91   82.82
   2   1  10 1429.27   57.66
  -1   3 -10 1296.12   54.38
  -2  -1  -7  398.19   25.14
  -3   2   7  364.27   24.09
   3  -2  -7  456.31   37.39
   1  -3   7  434.26   52.98
   2   1   7  378.98   32.51
  -1   3  -7  407.40   30.05
  -2  -1  -4 1518.55   58.62
  -3   2   4 1766.05   61.85
   3  -2  -4 1778.34  104.92
   1  -3   4 1467.78  111.29
  -1   3  -4 1569.90   56.33
   2   1   4 1669.25   63.95
  -2  -1  -1  638.83   34.11
  -3   2   1  678.49   36.85
   3  -2  -1  687.45   49.84
   1  -3   1  727.04   81.45
  -1   3  -1  638.67   33.11
   2   1   1  631.95   40.49
  -2  -1   2 1364.17   50.11
  -3   2  -2 1387.02   56.47
   3  -2   2 1340.59   73.29
   1  -3  -2 1433.08   96.50
  -1   3   2 1415.25   57.71
   2   1  -2 1425.64   55.35
   1  -3  -5 1160.58   38.20
  -2  -1   5 1057.18   48.87
  -3   2  -5 1012.55   50.38
   3  -2   5  996.74   73.05
   1  -3  -5 1048.88   79.56
  -1   3   5 1067.09   46.66
   2   1  -5 1010.53   48.46
  -2  -1   8   93.20   16.76
   1  -3  -8  101.33    6.92
   1  -3  -8  100.12    6.04
  -3   2  -8  103.83   18.72
   3  -2   8   72.09   50.92
   1  -3  -8  114.48   27.94
   2   1  -8  110.46   18.76
  -2  -1  11 4075.08  133.75
  -3   2 -11 3710.03  120.47
   2   1 -11 3994.22  131.55
   3  -2  11 4322.58  175.13
   1  -3 -11 3648.64  148.15
   2   1 -11 3868.23  123.50
  -2  -1  14   42.38   44.43
  -3   2 -14   61.06   18.50
   2   1 -14   91.40   20.06
   3  -2  14   57.34   38.71
   1  -3 -14  103.37   39.91
  -2  -1  17   20.26   23.23
  -3   2 -17   27.89   17.26
   2   1 -17   26.34   11.27
   3  -2  17   25.10   34.35
   1  -3 -17   29.07   21.35
  -2  -1  20    6.81   13.36
   3  -2  20   16.68   26.29
   1  -3 -20    7.13   14.96
  -2  -1  23   75.61   48.84
   3  -2  23  208.83   41.49
   1  -3 -23  141.86   34.25
  -2  -1  26  452.24   53.45
  -2  -1  29   -0.12    7.60
  -2  -1  32   64.18   40.99
  -3   1  29    0.83    8.58
  -3   1  26  675.14   69.30
  -3   1  23  120.63   21.41
   1   2  23  109.71   19.96
  -3   1  20    5.52    9.59
   3  -1 -20   13.79   11.20
   2  -3  20    5.45    7.59
   1   2  20    7.10    7.46
  -3   1  17   21.47   24.46
  -1  -2 -17   18.17    6.95
   3  -1 -17   17.93   22.61
   2  -3  17   21.72   12.29
   1   2  17   21.57    9.74
  -3   1  14   64.63   14.95
  -1  -2 -14   45.07    8.70
   3  -1 -14   53.87   35.08
   2  -3  14   63.06   17.15
   1   2  14   62.09   14.28
  -2   3 -14   47.09    9.81
  -3   1  11 3811.84  112.69
  -1  -2 -11 3840.92   95.53
   3  -1 -11 4064.31  134.06
   2  -3  11 3789.32  140.46
   1   2  11 3700.33  106.23
  -2   3 -11 4040.13  102.18
  -3   1   8   94.70   13.81
  -1  -2  -8   94.89   15.46
   3  -1  -8   85.33   28.81
   2  -3   8   86.77   24.99
   1   2   8  100.15   17.70
  -2   3  -8   89.78   10.99
  -1  -2  -5  930.66   34.84
  -3   1   5  993.14   45.89
   3  -1  -5 1005.75   62.41
   2  -3   5  731.39   64.41
  -2   3  -5  993.60   39.45
   1   2   5  974.97   48.53
  -1  -2  -2 1378.96   45.69
  -3   1   2 1378.70   53.50
   3  -1  -2 1433.75   75.87
   2  -3   2 1277.20   80.80
  -2   3  -2 1393.69   45.19
   1   2   2 1383.75   52.55
  -1  -2   1  641.60   32.29
  -3   1  -1  638.28   35.47
   3  -1   1  620.32   48.95
   2  -3  -1  628.45   53.15
  -2   3   1  670.14   30.40
   1   2  -1  620.47   35.17
  -1  -2   4 1571.81   59.80
  -3   1  -4 1753.98   65.33
   3  -1   4 1463.56   87.15
   2  -3  -4 1755.52   90.24
   1   2  -4 1663.46   64.71
  -1  -2   7  419.28   30.51
  -3   1  -7  372.02   29.57
   3  -1   7  315.06   42.34
   2  -3  -7  460.47   47.71
   1   2  -7  378.56   29.07
  -1  -2  10 1267.55   69.96
  -3   1 -10 1349.52   60.11
   3  -1  10 1245.47   85.21
   2  -3 -10 1207.17   66.62
   1   2 -10 1391.85   60.95
  -1  -2  13 1736.17   89.86
  -3   1 -13 1595.63   69.97
   3  -1  13 1906.80  115.89
   2  -3 -13 1855.81   95.58
   1   2 -13 1741.26   74.83
  -1  -2  16  428.85   54.55
  -3   1 -16  400.92   35.02
   3  -1  16  435.28   53.24
   2  -3 -16  367.56   37.38
   1   2 -16  436.94   38.06
  -1  -2  19   11.26   11.47
  -3   1 -19    5.39    9.52
   3  -1  19   13.19   18.45
   2  -3 -19    6.44   13.48
  -1  -2  22  583.04   76.95
  -3   1 -22  922.33   95.08
   2  -3 -22  866.52   89.01
  -1  -2  25  147.01   33.07
   2  -3 -25  275.95   55.72
  -1  -2  28  156.85   44.46
  -1  -2  31    6.60   18.92
  -3   0  30   10.01   14.31
  -3   0  27   -0.12    6.25
  -3   0  24  251.39   34.04
  -3   0  21  304.94   46.06
   3  -3  21  492.27   58.52
  -3   0  18   25.80   32.82
   3   0 -18   24.90   31.03
   3  -3  18   31.50   15.57
   0   3  18   25.56   12.63
  -3   0  15 1288.59   67.50
   3   0 -15 1444.83   76.43
   3  -3  15 1314.90   77.57
   0  -3 -15 1284.82  101.17
   0   3  15 1205.20   61.23
  -3   0  12   44.74   26.50
   3   0 -12   51.51   54.85
   3  -3  12   42.81   21.10
   0  -3 -12   58.08   34.56
   0   3  12   36.09   11.11
  -3   0   9  460.54   36.16
   0  -3  -9  472.60   25.40
  -3   3  -9  447.70   42.24
   3   0  -9  479.80   39.81
   3  -3   9  433.86   56.35
   0  -3  -9  441.52   63.06
   0   3   9  454.01   40.52
  -3   3  -9  489.70   21.88
   0  -3  -6  607.79   27.83
  -3   0   6  588.89   39.17
  -3   3  -6  585.65   45.71
   3   0  -6  636.14   50.60
   3  -3   6  517.52   60.05
   0  -3  -6  576.55   76.72
   0   3   6  579.38   37.87
  -3   3  -6  580.55   23.04
   0  -3  -3  207.29   17.40
  -3   0   3  190.49   22.50
  -3   3  -3  193.08   25.56
   3   0  -3  195.01   34.29
   3  -3   3  183.26   31.93
   0  -3  -3  172.99   46.69
  -3   3  -3  199.95   14.00
   0   3   3  191.07   26.74
   0  -3   0 5312.24  124.39
  -3   0   0 5876.60  149.90
  -3   3   0 5314.14  141.83
   3   0   0 5062.32  176.13
   3  -3   0 4962.39  164.44
   0   3   0 5887.11  148.96
   3   0   0 5511.49  139.26
   0  -3   3  175.80   27.21
  -3   0  -3  175.68   19.07
  -3   3   3  180.43   19.51
   3   0   3  152.77   46.86
   3  -3  -3  201.17   32.63
   0  -3   3  162.70   44.93
   0   3  -3  170.72   21.88
   3   0   3  164.00   16.18
   0  -3   6  718.75   49.53
  -3   0  -6  570.11   34.90
  -3   3   6  586.84   33.49
   3   0   6  468.93   57.28
   3  -3  -6  668.09   54.77
   0  -3   6  604.28   73.13
   0   3  -6  558.18   34.28
   3   0   6  579.56   29.88
   0  -3   9  490.78   39.51
  -3   0  -9  467.23   33.73
  -3   3   9  422.95   26.08
   3   0   9  449.78   56.93
   3  -3  -9  444.75   41.20
   0  -3   9  474.46   57.82
   0   3  -9  468.41   34.17
   3   0   9  428.37   29.69
   0  -3  12   36.40   41.92
  -3   0 -12   30.97   11.90
  -3   3  12   44.41    9.57
   3   0  12   36.01   51.71
   3  -3 -12   30.17   15.06
   0  -3  12   45.02   25.30
   3   0  12   24.29    6.23
   0   3 -12   34.80   15.25
   0  -3  15 1107.62   71.76
  -3   0 -15 1278.92   63.18
   3   0  15 1188.18   73.48
   0  -3  15 1214.29   81.58
   3   0  15 1116.79   50.61
   0   3 -15 1295.22   63.70
   0  -3  18   17.66   15.23
  -3   0 -18   29.74   14.33
   3   0  18   27.39   38.25
   3  -3 -18   45.54   21.48
   0   3 -18   28.98   12.86
   0  -3  21  289.30   46.16
  -3   0 -21  389.02   47.44
   3   0  21  446.25   56.52
   3  -3 -21  500.99   61.89
   0  -3  24  402.94   60.85
  -3   0 -24  412.47   53.53
   3   0  24  401.95   51.59
   0  -3  27    1.93    3.51
   0  -3  30   41.09   37.68
   1  -4  29   12.99   14.47
   1  -4  26  486.81   96.88
   3   1  26  799.22  154.44
  -3  -1 -23  146.64   35.11
   3   1  23  178.15   70.26
  -3  -1 -20   13.76   10.75
   3   1  20   21.58   25.12
   4  -3 -20   12.85   12.44
  -1   4 -20   13.55   11.42
  -3  -1 -17   10.39    9.24
   3   1  17   13.86   17.85
   4  -3 -17   16.45   13.56
   1  -4  17   24.93   22.99
   3   1  17   12.60   14.16
  -1   4 -17   12.43    9.30
  -4   3  14   22.01    9.26
  -3  -1 -14   34.59   13.00
   3   1  14   27.11   21.23
   4  -3 -14   29.72   16.35
   1  -4  14   33.07   21.25
   3   1  14   23.62   30.94
  -1   4 -14   28.55   12.05
  -3  -1 -11 1489.60  127.19
  -4   3  11 1524.67  129.15
   4  -3 -11 1725.15  311.33
   1  -4  11 2297.99  424.20
   3   1  11 1506.64  130.45
  -1   4 -11 1538.11  133.08
   1  -4   8   40.79   11.47
  -3  -1  -8   45.78   12.83
  -4   3   8   46.92   12.62
   4  -3  -8   51.33   15.89
   1  -4   8  103.88   48.79
  -1   4  -8   48.18   15.58
   3   1   8   48.23   22.79
   1  -4   5  388.71   29.02
  -3  -1  -5  410.85   31.68
  -4   3   5  449.55   34.46
   4  -3  -5  538.15   56.07
   1  -4   5  574.16   90.93
  -1   4  -5  425.36   41.33
   3   1   5  433.30   34.95
   1  -4   2  480.44   30.45
  -3  -1  -2  453.60   38.69
  -4   3   2  489.71   36.54
   4  -3  -2  464.24   52.73
   1  -4   2  343.86   70.94
  -1   4  -2  477.16   37.47
   3   1   2  483.21   33.75
   1  -4  -1  218.06   18.36
  -3  -1   1  182.55   20.79
  -4   3  -1  213.42   26.00
   3   1  -1  177.97   32.29
   4  -3   1  192.43   66.42
   1  -4  -1  238.85   61.88
  -1   4   1  197.51   24.16
   3   1  -1  196.72   22.86
   1  -4  -4  880.12   39.46
  -3  -1   4  862.53   50.52
  -4   3  -4  854.62   52.91
   3   1  -4  879.30   68.93
   4  -3   4  812.84   73.32
   1  -4  -4 1390.48  157.55
  -1   4   4  869.11   54.96
   3   1  -4  843.78   49.82
  -3  -1   7   23.66   35.54
  -4   3  -7   33.66   14.62
   3   1  -7   55.35   28.59
   1  -4  -7   46.58   32.95
  -1   4   7   24.05   38.35
   3   1  -7   31.84   12.64
  -3  -1  10  945.42  105.79
  -4   3 -10  962.66   95.86
   3   1 -10 1181.35  125.74
   4  -3  10  849.30  107.65
   1  -4 -10  967.69  116.50
  -1   4  10  953.83   88.91
  -3  -1  13 1048.34  105.20
  -4   3 -13 1045.50  104.92
   3   1 -13 1110.67  106.19
   4  -3  13 1279.84  138.08
   1  -4 -13 1436.80  170.72
  -1   4  13 1053.07   98.67
  -3  -1  16  407.77   48.58
  -4   3 -16  430.70   59.76
   3   1 -16  493.59   58.32
   4  -3  16  519.81   75.00
   1  -4 -16  426.96   73.62
  -1   4  16  383.47   46.53
  -3  -1  19   32.11   37.71
   4  -3  19   60.97   28.90
   1  -4 -19   40.46   27.40
  -3  -1  22  389.62   82.31
   4  -3  22  776.62  152.68
   1  -4 -22  487.60  108.85
  -3  -1  25   26.87   37.50
   1  -4 -25   43.55   24.09
  -3  -1  28   20.73   27.78
   2   2  27   11.83   19.72
   2   2  24  348.52   69.71
  -4   2  21  468.43   57.34
   4  -2 -21  521.43   59.59
   2   2  21  442.46   49.71
  -4   2  18    2.31    7.59
  -2  -2 -18   11.68    8.48
   4  -2 -18    9.35   10.58
   2  -4  18    8.71   16.25
   2   2  18    6.72   11.87
  -2   4 -18   14.18    8.75
  -4   2  15 1256.57  112.40
  -2  -2 -15 1157.48   99.65
   4  -2 -15 1170.69  110.04
   2  -4  15 1039.61  101.40
   2   2  15 1255.98  122.01
  -2   4 -15 1268.08  108.80
  -4   2  12    6.59    9.17
  -2  -2 -12    7.39    7.02
   4  -2 -12   15.03   20.19
   2  -4  12    5.63   13.90
   2   2  12    4.18    4.63
  -2   4 -12    9.69   10.40
  -2  -2  -9  122.34   15.53
  -4   2   9  109.59   16.41
   4  -2  -9  124.77   22.60
   2  -4   9  123.55   33.58
   2   2   9  122.57   18.34
  -2   4  -9  129.58   15.81
  -2  -2  -6  240.84   22.10
  -4   2   6  213.19   23.20
   4  -2  -6  282.55   36.64
   2  -4   6  152.34   36.05
  -2   4  -6  234.62   29.59
   2   2   6  228.26   27.78
  -2  -2  -3   53.45   19.82
  -4   2   3   50.72   13.15
   4  -2  -3   47.12   29.92
   2  -4   3   38.12   22.65
  -2   4  -3   50.27   16.19
   2   2   3   56.57   21.95
  -2  -2   0 3073.64   92.20
  -4   2   0 3248.21  106.41
   4  -2   0 2663.83  116.71
   2  -4   0 2815.22  150.56
  -2   4   0 3218.63   95.63
   2   2   0 3183.79  102.56
  -2  -2   3   47.33   16.74
  -4   2  -3   54.51   14.13
   4  -2   3   45.56   47.80
   2  -4  -3   56.93   23.52
  -2   4   3   57.35   30.81
   2   2  -3   52.99   12.76
  -2  -2   6  217.70   28.37
  -4   2  -6  223.30   26.37
   4  -2   6  147.92   46.04
   2  -4  -6  194.41   34.81
  -2   4   6  250.05   24.35
   2   2  -6  227.02   25.59
  -2  -2   9  127.58   18.16
  -4   2  -9  121.07   21.82
   4  -2   9   87.29   25.95
   2  -4  -9  117.35   29.12
   2   2  -9  124.11   20.63
  -2  -2  12   12.10    9.86
  -4   2 -12    5.08    9.96
   4  -2  12    9.32   16.40
   2  -4 -12    6.86   15.08
  -2  -2  15 1154.21  117.40
  -4   2 -15 1141.84  108.08
   4  -2  15 1326.31  132.14
   2  -4 -15 1123.59  117.33
   2   2 -15 1329.64  125.47
  -2  -2  18   11.17   15.25
  -4   2 -18    7.52   12.76
   2   2 -18    6.43   10.71
   4  -2  18   14.10   11.74
   2  -4 -18    9.52   12.84
  -2  -2  21  387.65   52.89
  -4   2 -21  507.45   66.24
   4  -2  21  655.68   80.18
   2  -4 -21  889.31  126.46
  -2  -2  24  257.42   64.21
   4  -2  24  570.36  115.05
   2  -4 -24  474.77  104.84
  -2  -2  27    5.37   10.18
  -4   1  28   27.77   36.68
   1   3  28   30.34   47.71
  -4   1  25   30.56   41.16
   1   3  25   31.89   47.10
  -4   1  22  401.97   79.63
   1   3  22  403.17   86.58
  -4   1  19   33.59   37.68
   4  -1 -19   37.71   41.12
   3  -4  19   57.93   23.01
   1   3  19   29.35   40.32
  -4   1  16  413.27   47.96
   4  -1 -16  463.03   57.06
   3  -4  16  466.87   61.21
   1   3  16  394.81   47.16
  -4   1  13 1077.76   99.67
   4  -1 -13 1249.65  135.65
   3  -4  13 1108.68  116.32
   1   3  13  987.90   91.90
  -4   1  10  970.82   96.56
  -1  -3 -10  989.34   83.40
   4  -1 -10  907.68   94.02
   1   3  10  938.49   97.20
  -1  -3  -7   31.42   11.54
  -4   1   7   35.23   39.13
   4  -1  -7   29.87   39.32
   3  -4   7   26.72   24.31
   1   3   7   35.15   20.24
  -3   4  -7   25.30   10.31
  -1  -3  -4  928.51   51.17
  -4   1   4  850.42   50.81
   4  -1  -4 1138.70   81.96
   3  -4   4  770.12   82.23
  -3   4  -4  845.51   42.88
   1   3   4  884.01   51.44
  -1  -3  -1  202.77   19.73
  -4   1   1  190.08   22.31
   4  -1  -1  204.98   34.35
   3  -4   1  236.18   44.70
  -3   4  -1  196.62   20.84
   1   3   1  202.28   28.55
  -1  -3   2  410.01   31.55
  -4   1  -2  473.23   36.36
   4  -1   2  455.84   78.27
   3  -4  -2  499.97   57.22
  -3   4   2  457.13   28.75
   1   3  -2  464.22   44.15
  -1  -3   5  385.42   33.66
  -4   1  -5  457.99   37.69
   4  -1   5  417.43   58.54
   3  -4  -5  480.20   55.16
   1   3  -5  425.35   43.84
  -1  -3   8   46.12   23.52
  -4   1  -8   55.14   17.35
   4  -1   8   30.50   56.18
   3  -4  -8   79.61   31.18
   1   3  -8   48.32   19.37
  -1  -3  11 1402.02  131.24
  -4   1 -11 1543.52  135.44
   4  -1  11 1731.27  320.75
   3  -4 -11 1571.11  285.35
   1   3 -11 1561.87  278.35
  -1  -3  14   28.28   36.12
  -4   1 -14   22.96   14.01
   4  -1  14   37.37   71.55
   3  -4 -14   24.52   18.65
   1   3 -14   27.66   13.06
  -1  -3  17   12.58   15.22
  -4   1 -17   12.06   10.04
   4  -1  17   12.45   13.92
   3  -4 -17   15.35   18.29
   1   3 -17   14.16   15.80
  -1  -3  20    7.32    6.01
  -4   1 -20   10.59   11.94
   4  -1  20   14.52   18.65
   3  -4 -20   17.52   17.96
  -1  -3  23   82.64   33.30
  -4   1 -23  159.99   40.63
   4  -1  23  175.46   44.56
   3  -4 -23  217.34   57.92
  -1  -3  26  392.92   98.32
  -4   1 -26  633.37  125.37
  -1  -3  29    9.19   17.63
  -4   0  26  316.25   65.78
   0   4  26  428.29   87.02
  -4   0  23  112.47   29.54
   0   4  23  126.85   33.97
  -4   0  20   27.01   28.46
   4  -4  20   35.95   19.60
   0   4  20   28.32   40.89
  -4   0  17   24.97   21.18
   4   0 -17   26.60   35.01
   4  -4  17   30.35   20.84
   0   4  17   23.33   25.97
  -4   0  14   27.14   24.72
   4   0 -14   33.22   52.87
   4  -4  14   35.56   22.65
   0   4  14   26.95   30.70
  -4   0  11  955.84  106.69
   4   0 -11 1240.58  145.50
   4  -4  11  994.15  116.03
   0  -4 -11  904.55  117.46
   0   4  11  954.67   91.42
  -4   0   8   19.45   42.51
   4   0  -8   25.69   27.49
   4  -4   8   14.49   17.36
   0  -4  -8   20.50   26.10
   0   4   8   25.07   31.33
   0  -4  -5  345.00   36.81
  -4   0   5  294.84   42.62
  -4   4  -5  276.77   41.80
   4   0  -5  316.54   48.99
   4  -4   5  228.08   47.22
   0  -4  -5  272.79   71.68
   0   4   5  304.53   42.48
   0  -4  -2  264.19   29.06
  -4   0   2  266.27   38.47
  -4   4  -2  249.90   38.15
   4   0  -2  232.44   76.10
   4  -4   2  220.74   44.25
   0  -4  -2  187.21   65.56
  -4   4  -2  259.27   26.90
   0   4   2  247.37   34.24
   0  -4   1   67.86   26.74
  -4   0  -1   73.09   16.84
  -4   4   1   66.50   17.24
   4   0   1   64.60   76.93
   4  -4  -1   65.60   26.31
   0  -4   1   52.73   41.39
   0   4  -1   75.48   44.42
   0  -4   4  551.58   51.77
  -4   0  -4  639.22   63.40
  -4   4   4  616.57   63.67
   4   0   4  578.89   80.47
   4  -4  -4  678.24   79.54
   0  -4   4  686.75  115.87
   0   4  -4  644.75   63.34
   4   0   4  643.54   62.75
   0  -4   7    2.51    4.52
  -4   0  -7    1.43    7.71
  -4   4   7    3.68    9.08
   4   0   7    6.95   25.95
   4  -4  -7    6.53   12.55
   0  -4   7    0.27   20.50
   0   4  -7    2.87    5.87
   4   0   7    2.15    5.04
   0  -4  10  913.61   87.42
  -4   0 -10  893.95   85.64
   4   0  10  842.68  101.83
   4  -4 -10  917.72   98.50
   0  -4  10  860.58  107.60
   0   4 -10  890.74   91.43
   0  -4  13  982.60  109.14
  -4   0 -13  901.23   87.12
   4   0  13  934.59  106.72
   4  -4 -13  990.12  105.97
   0   4 -13  942.53   90.37
   0  -4  16  389.10   53.29
  -4   0 -16  417.10   51.06
   4   0  16  452.90   72.37
   4  -4 -16  484.83   66.16
   0   4 -16  426.31   50.44
   0  -4  19   54.51   44.88
  -4   0 -19   77.63   25.98
   4   0  19   63.32   87.45
   4  -4 -19  131.89   49.06
   0   4 -19   81.63   27.98
   0  -4  22  228.66   55.18
  -4   0 -22  395.97   80.27
   4   0  22  460.65  101.70
   4  -4 -22  517.34  107.14
   0  -4  25   12.89   15.15
  -4   0 -25   25.27   20.51
   4   0  25   20.70   23.90
   1  -5  21  116.13   61.67
  -4  -1 -21  244.94   54.33
   4   1  21  259.88   64.55
   5  -4 -21  351.47   83.40
  -1   5 -21  265.11   59.10
   1  -5  18    8.61   11.09
  -4  -1 -18   17.49   12.91
   4   1  18   25.42   28.09
   5  -4 -18   16.17   16.57
  -1   5 -18   18.30   13.59
   1  -5  15  290.42   97.14
  -4  -1 -15  373.18   74.12
   4   1  15  457.98  103.14
   5  -4 -15  359.88   76.26
   1  -5  15  417.03   98.16
  -1   5 -15  385.08   76.19
   1  -5  12    1.42    5.65
  -4  -1 -12    0.95    9.21
   4   1  12   -0.59   14.97
   5  -4 -12    2.60   12.77
   1  -5  12   13.55   35.20
  -1   5 -12    0.65    7.15
   1  -5   9   63.69   28.17
  -4  -1  -9   48.92   16.87
  -5   4   9   55.14   16.76
   4   1   9   42.50   62.78
   5  -4  -9   57.79   23.70
   1  -5   9   56.65   35.00
  -1   5  -9   53.85   27.17
   4   1   9   53.27   14.51
   1  -5   6  203.87   36.83
  -4  -1  -6  171.14   25.97
  -5   4   6  184.58   29.52
   4   1   6  105.23   83.13
   5  -4  -6  182.92   36.63
   1  -5   6  199.38   62.24
  -1   5  -6  175.50   55.57
   4   1   6  177.46   26.68
   1  -5   3   94.98   23.28
  -4  -1  -3   97.24   21.98
  -5   4   3   96.90   22.40
   4   1   3   74.20   36.55
   5  -4  -3  114.55   34.61
   1  -5   3  104.77   66.73
  -1   5  -3  108.77   21.21
   4   1   3   90.56   19.23
  -4  -1   0 1338.15  140.51
  -5   4   0 1341.40  125.51
   4   1   0 1304.97  140.43
   5  -4   0 1447.52  154.09
   1  -5   0 1025.28  164.08
  -1   5   0 1377.23  126.08
   4   1   0 1328.46  119.60
  -4  -1   3  126.00   24.63
  -5   4  -3  114.63   25.43
   4   1  -3  141.20   48.24
   5  -4   3  106.81   35.19
   1  -5  -3  142.51   55.81
  -1   5   3  119.28   43.43
   4   1  -3  109.35   22.76
  -4  -1   6  184.35   30.22
  -5   4  -6  194.55   37.30
   4   1  -6  211.27   94.38
   5  -4   6  116.60   36.20
   1  -5  -6  187.86   60.44
  -1   5   6  198.31   31.97
  -4  -1   9   59.58   39.79
  -5   4  -9   63.08   22.99
   4   1  -9   49.65   50.36
   5  -4   9   33.80   23.68
   1  -5  -9   71.05   41.11
  -1   5   9   52.36   23.74
  -4  -1  12   -0.42   10.59
  -5   4 -12    3.65   18.74
   4   1 -12    2.33    6.97
   5  -4  12   -0.76   18.79
   1  -5 -12   12.49   38.35
  -1   5  12    2.49    9.90
  -4  -1  15  390.83   79.19
   4   1 -15  488.03  102.45
   5  -4  15  562.90  123.82
   1  -5 -15  348.11   87.43
  -1   5  15  370.09   75.93
  -4  -1  18   18.02   25.08
   5  -4  18   37.58   30.12
   1  -5 -18   20.24   32.22
  -1   5  18   16.25   20.70
  -4  -1  21  200.98   48.99
   5  -4  21  300.85   74.51
   1  -5 -21  194.03   58.37
  -1   5  21  194.33   83.36
   5  -3 -19   33.32   17.20
   3   2  19   19.05   24.19
  -5   3  16  186.27   41.39
  -3  -2 -16  223.17   47.24
   5  -3 -16  278.92   65.77
   2  -5  16  208.68   53.01
   3   2  16  208.90   58.92
  -2   5 -16  234.97   48.79
  -5   3  13  431.00   49.95
  -3  -2 -13  487.86   53.31
   5  -3 -13  468.31   60.61
   2  -5  13  362.59   55.55
   3   2  13  449.98   54.04
  -2   5 -13  471.86   55.92
  -3  -2 -10  457.54   49.58
  -5   3  10  418.57   48.78
   5  -3 -10  449.12   58.73
   2  -5  10  360.95   57.46
   3   2  10  437.68   50.51
  -2   5 -10  450.16   48.70
  -3  -2  -7   32.57   13.01
  -5   3   7   34.33   13.96
   5  -3  -7   27.34   29.94
   2  -5   7   28.95   22.22
  -2   5  -7   18.74   27.21
   3   2   7   36.77   25.94
  -3  -2  -4  273.85   45.61
  -5   3   4  229.41   33.21
   5  -3  -4  298.70   68.39
   2  -5   4  140.18   42.45
  -2   5  -4  266.44   33.60
   3   2   4  238.39   39.37
   2  -5   1  194.48   24.52
  -3  -2  -1  195.79   28.41
  -5   3   1  226.70   33.62
   5  -3  -1  242.69   50.93
   2  -5   1  150.83   44.67
  -2   5  -1  210.10   29.74
   3   2   1  229.56   33.09
  -3  -2   2  399.80   45.50
  -5   3  -2  434.69   52.94
   5  -3   2  398.10   64.83
   2  -5  -2  339.26   63.72
  -2   5   2  415.02   48.67
   3   2  -2  431.68   50.85
  -3  -2   5  453.25   50.04
  -5   3  -5  540.21   63.54
   5  -3   5  387.05   63.58
   2  -5  -5  406.90   67.46
  -2   5   5  493.84   55.44
   3   2  -5  519.25   58.97
  -3  -2   8  130.18   22.52
  -5   3  -8  151.07   29.60
   5  -3   8   73.84   92.82
   2  -5  -8  127.83   38.17
  -2   5   8  152.07   26.62
   3   2  -8  167.41   33.32
  -3  -2  11  946.84   90.74
  -5   3 -11 1014.49  102.36
   3   2 -11 1061.81  110.04
   5  -3  11  941.58  113.96
   2  -5 -11 1069.37  130.55
  -2   5  11  973.84   93.93
   3   2 -11 1089.04  107.77
  -3  -2  14    4.93    9.47
  -5   3 -14   -0.42   10.74
   3   2 -14   12.10   19.46
   5  -3  14   18.58   30.42
  -2   5  14   10.70   12.87
  -3  -2  17    6.05   13.00
  -5   3 -17    1.68   12.92
   3   2 -17    5.88    9.38
   5  -3  17    9.14   17.04
   2  -5 -17   49.59   35.10
  -2   5  17    6.04    7.99
  -3  -2  20    5.64    9.93
  -5   3 -20   -1.01   16.64
   5  -3  20   15.08   30.32
   2  -5 -20    7.81   24.15
  -2   5  20    3.46   12.76
  -3  -2  23   51.26   43.14
   5  -3  23  105.31   66.57
   2  -5 -23   66.41   35.69
  -5   2  23   52.26   70.38
   2   3  23   37.81   69.08
  -5   2  20    6.29   19.09
   5  -2 -20   12.16   22.40
   2   3  20    3.39    8.47
  -5   2  17    5.88   12.78
   5  -2 -17    9.27   15.65
   3  -5  17    1.38   12.21
   2   3  17    3.13    6.77
  -5   2  14   13.15   13.57
   5  -2 -14   15.07   23.27
   3  -5  14   13.30   26.93
   2   3  14    4.18    7.95
  -5   2  11  986.09   93.50
   5  -2 -11  980.92  120.89
   3  -5  11 1039.13  117.64
   2   3  11 1086.52  106.33
  -2  -3  -8  173.24   53.34
  -5   2   8  147.74   25.42
   5  -2  -8  173.97   36.55
   3  -5   8  118.70   36.35
   2   3   8  168.30   35.87
  -3   5  -8  148.84   32.39
  -2  -3  -5  525.56   66.99
  -5   2   5  475.39   54.26
   5  -2  -5  493.72   64.79
   3  -5   5  295.02   57.48
  -3   5  -5  496.31   51.86
   2   3   5  522.89   77.24
  -2  -3  -2  434.64   50.90
  -5   2   2  425.22   50.27
   5  -2  -2  391.21   56.45
   3  -5   2  307.86   59.93
  -3   5  -2  404.59   46.00
   2   3   2  435.00   50.42
  -2  -3   1  198.31   26.84
  -5   2  -1  234.82   35.18
   5  -2   1  187.26   40.19
   3  -5  -1  210.00   50.89
  -3   5   1  202.10   29.00
   2   3  -1  224.80   36.23
  -2  -3   4  223.98   44.16
  -5   2  -4  231.67   35.40
   5  -2   4  218.20   48.22
   3  -5  -4  293.77   63.75
  -3   5   4  257.24   36.29
   2   3  -4  230.23   33.60
  -2  -3   7   18.26   23.06
  -5   2  -7   61.86   19.60
   5  -2   7    7.86   13.87
   3  -5  -7   39.28   25.00
  -3   5   7   26.55   13.47
  -2  -3  10  397.72   53.01
  -5   2 -10  438.49   55.82
   5  -2  10  340.25   60.07
   3  -5 -10  394.25   61.69
  -3   5  10  417.59   47.36
   2   3 -10  433.19   55.13
  -2  -3  13  408.95   49.55
  -5   2 -13  447.33   57.50
   5  -2  13  471.43   70.96
   3  -5 -13  500.56   75.64
   2   3 -13  455.96   58.37
  -2  -3  16  200.15  102.56
  -5   2 -16  219.28   51.94
   5  -2  16  282.06   69.56
   3  -5 -16  265.32   68.58
   2   3 -16  216.08   50.57
  -2  -3  19   21.00   19.39
  -5   2 -19   28.94   19.07
   5  -2  19   23.47   53.75
   3  -5 -19   30.44   25.38
  -2  -3  22  175.56  116.49
  -5   2 -22  200.68   52.24
   5  -2  22  225.90   55.11
   3  -5 -22  196.71   57.78
  -5   1  21  196.53   76.09
   1   4  21  202.53   61.95
  -5   1  18   19.26   37.88
   5  -1 -18   27.65   26.15
   4  -5  18   45.48   33.19
   1   4  18   19.23   25.08
  -5   1  15  421.69   85.36
   5  -1 -15  507.07  103.36
   4  -5  15  470.41  104.29
   1   4  15  382.27   89.16
  -5   1  12    2.14    4.97
   5  -1 -12    1.19   11.17
   4  -5  12    5.34   16.52
   1   4  12    1.89    6.55
  -5   1   9   55.68   19.49
   5  -1  -9   50.22   45.54
   4  -5   9   45.37   27.15
   1   4   9   63.44   52.37
  -5   1   6  182.06   30.56
   5  -1  -6  208.59  111.20
   4  -5   6  102.41   37.93
   1   4   6  199.09   37.22
  -1  -4  -3  129.03   21.53
  -5   1   3  112.31   23.57
   5  -1  -3  151.98   95.66
   4  -5   3   89.07   34.68
   1   4   3  133.34   25.85
  -1  -4   0 1367.08  116.80
  -5   1   0 1307.69  118.58
   5  -1   0 1442.54  150.94
   4  -5   0 1335.80  146.78
  -4   5   0 1349.93  122.06
   1   4   0 1308.05  134.40
  -1  -4   3   95.51   20.72
  -5   1  -3   96.44   23.01
   5  -1   3   84.71   50.86
   4  -5  -3  120.78   42.88
  -4   5   3  102.74   19.57
   1   4  -3  103.51   23.05
  -1  -4   6  147.30   22.95
  -5   1  -6  196.72   32.97
   5  -1   6  119.52   70.20
   4  -5  -6  331.92   72.27
   1   4  -6  196.54   31.35
  -1  -4   9   44.44   31.49
  -5   1  -9   51.62   16.80
   5  -1   9   31.39   74.56
   4  -5  -9   74.78   32.01
   1   4  -9   56.27   17.10
  -1  -4  12    1.38    5.98
  -5   1 -12    1.53    9.42
   5  -1  12    1.82   13.56
   4  -5 -12   12.07   17.95
   1   4 -12    2.33    8.60
  -1  -4  15  308.52   67.15
  -5   1 -15  376.71   78.19
   5  -1  15  408.67   91.71
   4  -5 -15  384.05   87.08
   1   4 -15  371.91   75.89
  -1  -4  18   14.23    8.42
  -5   1 -18   16.40   15.90
   5  -1  18   20.67   28.74
   4  -5 -18   31.78   28.04
   1   4 -18   18.18   14.10
  -1  -4  21  159.84  114.13
  -5   1 -21  234.46   54.90
   5  -1  21  292.33   70.73
   4  -5 -21  242.98   61.72
  -5   0  16  185.56   80.34
   5   0 -16  229.43  154.30
   5  -5  16  267.79   70.56
   0   5  16  188.57   45.78
  -5   0  13  351.08   75.18
   5   0 -13  517.58  115.01
   5  -5  13  386.92   95.17
   0   5  13  319.04   67.43
  -5   0  10  341.37   72.71
   5   0 -10  392.98   88.12
   5  -5  10  283.18   74.49
   0   5  10  331.74   70.61
  -5   0   7    1.04    5.49
   5   0  -7    6.00   15.44
   5  -5   7    0.44   18.82
   0   5   7    1.48   14.01
  -5   0   4  138.54   36.50
   5   0  -4  159.18  139.23
   5  -5   4   90.23   41.55
   0   5   4  129.44   38.47
  -5   0   1  101.46   30.80
   5   0  -1  110.24  112.39
   5  -5   1  101.17   39.18
   0   5   1  112.36   44.89
  -5   0  -2  195.14   43.88
   5   0   2  199.68   57.04
   5  -5  -2  201.15   58.04
   0   5  -2  196.36   55.42
   0  -5   5  241.38   49.25
  -5   0  -5  275.90   59.05
   5   0   5  178.55   53.43
   5  -5  -5  309.19   75.02
   0   5  -5  284.71   59.26
   0  -5   8   87.38   51.75
  -5   0  -8  111.23   29.49
   5   0   8   58.18   95.14
   5  -5  -8  123.22   41.93
   0   5  -8  116.84   62.98
   0  -5  11  398.80   81.87
  -5   0 -11  476.74   93.06
   5   0  11  450.31  102.14
   5  -5 -11  706.29  147.49
   0   5 -11  515.00  100.00
   0  -5  14    1.87    6.74
  -5   0 -14    1.85    9.28
   5   0  14    0.93   11.40
   5  -5 -14    2.38   15.77
   0   5 -14    4.12    9.88
   0  -5  17    4.88   15.02
  -5   0 -17   -0.70   10.13
   5   0  17  121.38   41.59
   5  -5 -17   -0.59   23.93
   0   5 -17   -0.17   14.66
  -5  -1  -4   43.55   20.51
   5   1   4   26.71   25.31
   6  -5  -4   43.68   29.59
   1  -6   4   52.26   40.41
  -1   6  -4   37.29   33.40
  -5  -1  -1   90.96   26.24
  -6   5   1   68.81   28.97
   5   1   1   54.28   49.06
   6  -5  -1  104.88   44.39
   1  -6   1   35.93   32.47
  -1   6  -1   93.70   44.43
  -5  -1   2  185.15   62.89
  -6   5  -2  161.25   43.99
   5   1  -2  135.08  111.33
   6  -5   2  203.32   64.91
   1  -6  -2   93.01   49.88
  -1   6   2  196.83   50.76
   2  -6  11  371.53   83.55
  -4  -2 -11  414.39   82.64
   4   2  11  380.94   92.63
   6  -4 -11  427.36   93.30
   2  -6  11  399.44   99.46
  -2   6 -11  433.57   85.65
  -4  -2  -8  117.69   32.24
  -6   4   8  106.80   30.94
   4   2   8   77.49   35.46
   6  -4  -8  136.23   44.98
   2  -6   8  100.38   43.97
  -2   6  -8  122.09   61.59
   4   2   8  118.82   32.41
  -4  -2  -5  279.28   58.49
  -6   4   5  246.53   54.62
   4   2   5  146.62   50.17
   6  -4  -5  261.32   64.84
   2  -6   5  224.41   69.92
  -2   6  -5  273.97  114.75
   4   2   5  254.66   54.87
  -4  -2  -2  181.19   83.01
  -6   4   2  157.82   39.75
   4   2   2  137.39   46.02
   6  -4  -2  180.02   53.38
   2  -6   2   78.93   40.53
  -2   6  -2  190.31   72.91
   4   2   2  155.79   38.11
  -4  -2   1   92.85   38.87
  -6   4  -1   86.10   30.91
   4   2  -1  100.14   41.05
   6  -4   1  126.43   49.19
   2  -6  -1   55.11   41.91
  -2   6   1  103.47   54.57
   4   2  -1   83.35   26.74
  -4  -2   4   81.39   33.98
  -6   4  -4   89.70   31.49
   4   2  -4  111.48   44.23
   6  -4   4  125.70   56.83
   2  -6  -4   68.24   39.80
  -2   6   4   80.91   40.02
   4   2  -4  100.18   30.37
  -4  -2   7    2.40    8.92
  -6   4  -7    2.67   11.60
   4   2  -7    2.83   11.86
   6  -4   7    0.40   21.08
   2  -6  -7    5.56   27.76
  -2   6   7    4.52    8.68
   4   2  -7    3.74   11.89
  -4  -2  10  228.41  103.54
  -6   4 -10  262.36   61.72
   4   2 -10  373.85  188.94
   6  -4  10  224.72   73.23
   2  -6 -10  371.43  111.44
  -2   6  10  237.36   54.31
  -6   3  12    0.06    8.35
   6  -3 -12    3.15   15.83
   3  -6  12    1.16   15.51
   3   3  12    1.40   12.00
  -6   3   9   36.07   17.94
   6  -3  -9   39.69   44.16
   3  -6   9   28.65   28.23
   3   3   9   31.06   50.25
  -3  -3  -6  173.47   96.95
  -6   3   6  141.11   38.78
   6  -3  -6  196.83   56.45
   3  -6   6  137.84   50.79
   3   3   6  159.36   40.08
  -3  -3  -3  143.05   62.73
  -6   3   3  110.96   31.98
   6  -3  -3  124.34  121.77
   3  -6   3   75.16   40.88
  -3   6  -3  131.93   61.41
   3   3   3  122.85   32.50
  -3  -3   0  842.02  161.64
  -6   3   0  780.28  146.95
   6  -3   0  886.04  177.73
   3  -6   0  648.74  146.31
  -3   6   0  884.31  169.14
   3   3   0  925.98  172.79
  -3  -3   3  122.94   51.85
  -6   3  -3  124.98   35.90
   6  -3   3   90.05   58.77
   3  -6  -3  118.32   51.94
  -3   6   3  122.22   60.00
   3   3  -3  115.73   32.52
  -3  -3   6  128.94   63.29
  -6   3  -6  145.67   39.28
   6  -3   6   89.94   68.52
   3  -6  -6  128.51   52.47
  -3   6   6  165.56   66.91
   3   3  -6  156.95   39.91
  -3  -3   9   31.28   34.62
  -6   3  -9   43.50   21.87
   6  -3   9   15.80   19.89
   3  -6  -9   38.17   30.53
  -3   6   9   32.35   41.35
   3   3  -9   39.63   21.19
  -3  -3  12    1.14    4.12
  -6   3 -12    6.25   13.78
   6  -3  12    9.61   24.65
   3  -6 -12    7.52   24.96
  -3   6  12    2.47    4.97
   3   3 -12    0.96   12.98
  -6   2  10  250.93   56.46
   6  -2 -10  311.23  136.75
   4  -6  10  251.06   73.99
   2   4  10  258.37   57.83
  -6   2   7    6.73   13.59
   6  -2  -7    5.20   16.24
   4  -6   7    7.69   19.41
   2   4   7    1.03    6.62
  -6   2   4   95.06   30.60
   6  -2  -4   72.41   93.25
   4  -6   4   59.60   39.90
   2   4   4   95.52   68.51
  -2  -4  -1  110.66   52.10
  -6   2   1   87.72   28.02
   6  -2  -1   87.43   96.24
   4  -6   1   71.65   40.69
   2   4   1   85.74   50.86
  -2  -4   2  158.01   75.68
  -6   2  -2  152.10   38.78
   6  -2   2  168.53   70.67
   4  -6  -2  184.53   67.93
   2   4  -2  179.51   43.88
  -2  -4   5  226.69   46.99
  -6   2  -5  265.48   60.05
   6  -2   5  223.31   63.97
   4  -6  -5  318.21   92.37
  -4   6   5  256.59   53.07
   2   4  -5  253.27   55.87
  -2  -4   8   84.90   33.19
  -6   2  -8  103.07   30.36
   6  -2   8   58.81   86.42
   4  -6  -8  117.29   46.07
  -4   6   8  112.68   52.09
   2   4  -8  115.06   33.82
  -2  -4  11  296.16  113.99
  -6   2 -11  405.96   85.63
   6  -2  11  333.92   85.68
   4  -6 -11  379.37   90.27
  -4   6  11  401.87   80.72
   2   4 -11  382.97   79.39
  -6   1   2  158.75   40.48
   6  -1  -2  214.25  112.59
   5  -6   2  229.38   84.76
   1   5   2  171.21   42.65
  -6   1  -1   72.08   25.41
   6  -1   1   94.97   92.18
   5  -6  -1  121.33   61.56
   1   5  -1   71.67   27.79
  -6   1  -4   56.36   23.41
   6  -1   4   39.61   47.14
   5  -6  -4   57.88   40.06
   1   5  -4   45.07   55.84
   0   0   0    0.00    0.00
;
_shelx_hkl_checksum   37855
